# Supplementary material
Source: publisher figshare collection journal article supplement (https://frontiersin.figshare.com/ndownloader/files/13141820)
Supplement: Supplementary file [file 13141820]

## Supplementary materials

### Supplementary materials 1.

**Sequences, targets, sizes of amplicons and references for the Universal probes and primers used.** Common fluorescence-specific tails are indicated in *Italics*. Fluorophores and quenchers are in **Bold**.

| Name        | Sequence (5' – 3')                                                                 | Target                       | Reference                                                                         |
|-------------|------------------------------------------------------------------------------------|------------------------------|-----------------------------------------------------------------------------------|
| Uni-Probe-1 | <b>FAM</b> -AGCGATGCGTTCGAGCATCGC-( <b>T*-BHQ1</b> )- <i>GAAGGTGACCAAGTTCATGCT</i> | Amplifluor-like PCR          | Myakishev et al., 2001; Rickert et al., 2004; Khripin, 2006; Jatayev et al., 2017 |
| Uni-Probe-2 | <b>VIC</b> -AGGACGCTGAGATGCGTCC-( <b>T*-BHQ1</b> )- <i>GAAGGTGCGGAGTCAACGGATT</i>  |                              |                                                                                   |
| KATU-48-F1  | <i>GAAGGTGACCAAGTTCATGCTGTTGCTTCTTCCTTGCCGA</i>                                    | Amplifluor-like PCR, 75 bp   | Shavrukov et al., 2016                                                            |
| KATU-48-F2  | <i>GAAGGTGCGGAGTCAACGGATTGTTGCTTCTTCCTTGCCGC</i>                                   |                              |                                                                                   |
| KATU-48-R   | TCTGTGGACTCAAGCGCATC                                                               |                              |                                                                                   |
| KATU-W58-F1 | <i>GAAGGTGACCAAGTTCATGCTCCTAATGGTAGCTTCGAC</i>                                     | Amplifluor-like PCR, 99 bp   | Current study                                                                     |
| KATU-W58-F2 | <i>GAAGGTGCGGAGTCAACGGATTTCCTAATGGTAGCTTCGAT</i>                                   |                              |                                                                                   |
| KATU-W58-R  | AAGGTACTGTTTACTAGATCAG                                                             |                              |                                                                                   |
| KATU-48-Fq  | TGTTGCTTCTTCCTTGCCG                                                                | qPCR, 75 bp                  | Current study                                                                     |
| KATU-48-Rq  | TCTGTGGACTCAAGCGCAT                                                                |                              |                                                                                   |
| KATU-W58-Fq | TTCCTAATGGTAGCTTCGA                                                                | qPCR, 97 bp                  | Current study                                                                     |
| KATU-W58-Rq | GGTACTGTTTACTAGATCAG                                                               |                              |                                                                                   |
| ADPRF-F     | GCTCTCCAACAACATTGCCAAC                                                             | Reference gene, qPCR, 165 bp | Paolacci et al., 2009                                                             |
| ADPRF-R     | GCTTCTGCCTGTACATACGC                                                               |                              |                                                                                   |
| GAPDH-F     | TTGCTCTGAACGACCATTTC                                                               | Reference gene, qPCR, 175 bp |                                                                                   |
| GAPDH-R     | GACACCATCCACATTTATTCTTC                                                            |                              |                                                                                   |

## Supplementary materials 2.

**SNP position and design of allele-specific primers for the Amplifluor-like SNP marker KATU-W58 in wheat.** The sequence was retrieved from the Cereal DB database (<http://www.cerealsdb.uk.net/cerealgenomics/CerealsDB>), Contig BC000018972. The SNP position in the sequence is indicated with a 'Y' highlighted in red, and consists of either a 'C' or 'T' nucleotide. Two forward primers and one common reverse primer are shown in Bold and highlighted in blue and purple, respectively. Amplicon size is indicated. The tails are shown in normal case.

### Sequence:

5' -T**TCCTAATGGTAGCTTCGA**YGCTGGTATGGCACCAGCGGTAGGNNNNNNNGATTGTGATTTGT  
TAGGTGATTTGAGAC**CTGATCTAGTAAACAGTACCTT**CGTTTTCGCCCTAGTTTCTATCTAATC-3'

PCR product size: 99 bp

### Primers:

KATU-W58-F1: 5' -GAAGGTGACCAAGTTCATGCT**TCCTAATGGTAGCTTCGAC**-3'

KATU-W58-F2: 5' -GAAGGTCGGAGTCAACGGATT**TCCTAATGGTAGCTTCGAT**-3'

KATU-W58-R: 5' -**AAGGTACTGTTTACTAGATCAG**
